# Supplementary material for: A novel consortium of Lactobacillus rhamnosus and Streptococcus thermophilus for increased access to functional fermented foods
Source: PubMed Central journal article supplement (PMC4672519; doi:10.1186/s12934-015-0370-x), 2015-12-08

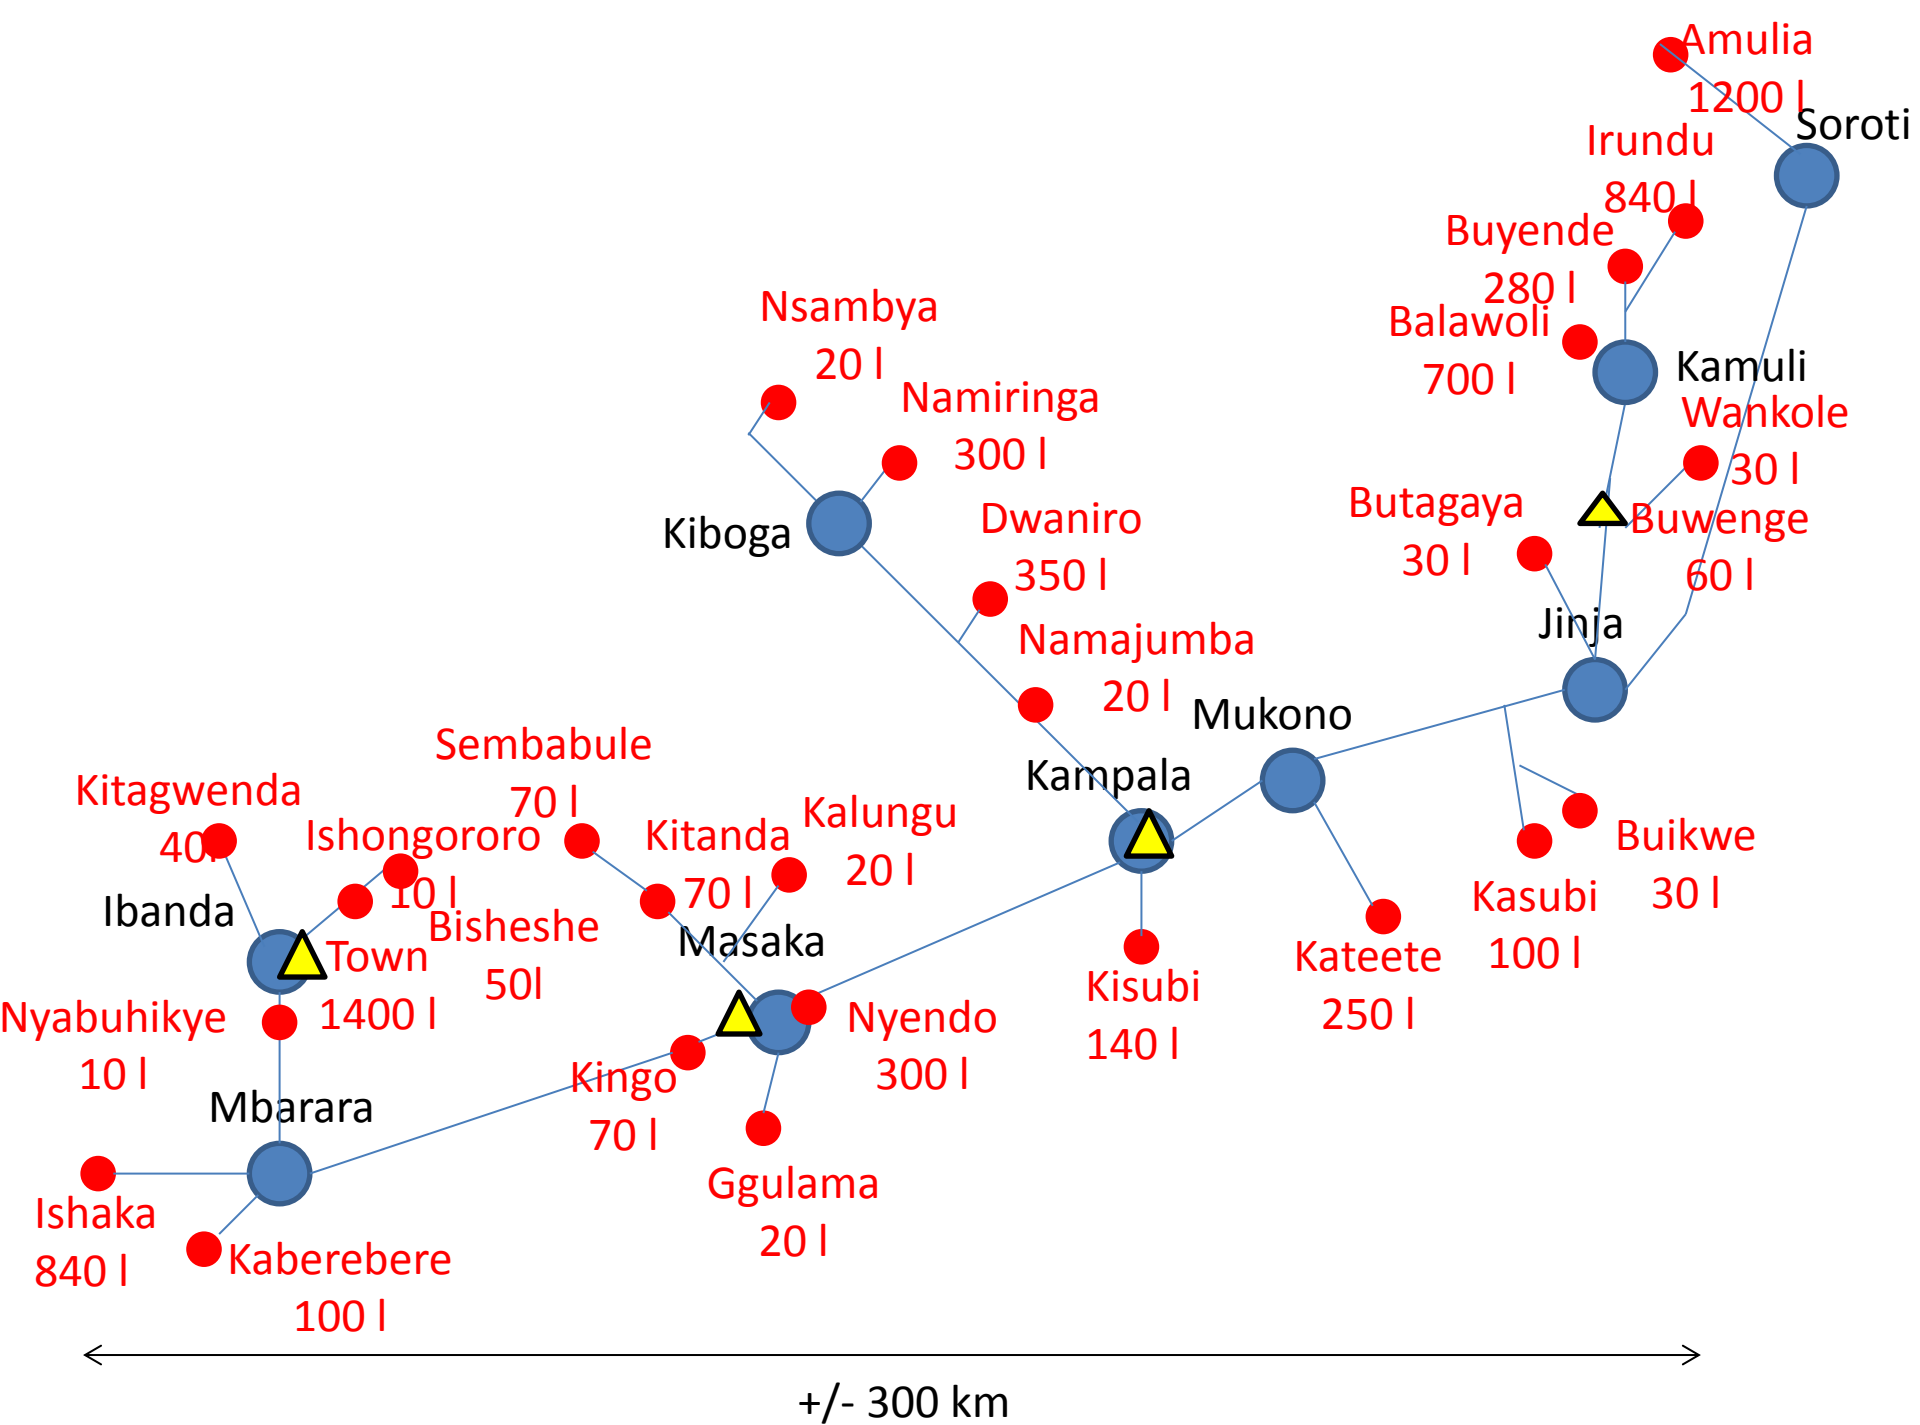

Supplement: 12934_2015_370_MOESM3_ESM.pdf [file 12934_2015_370_MOESM3_ESM.pdf]
